# Supplementary material for: A Long-Read Genome Assembly of a Native Mite in China Pyemotes zhonghuajia Yu, Zhang & He (Prostigmata: Pyemotidae) Reveals Gene Expansion in Toxin-Related Gene Families
Source: MDPI journal article supplement (doi:10.3390/toxins14080571), 2022-08-21
Supplement: s1 [file s1]

(a)

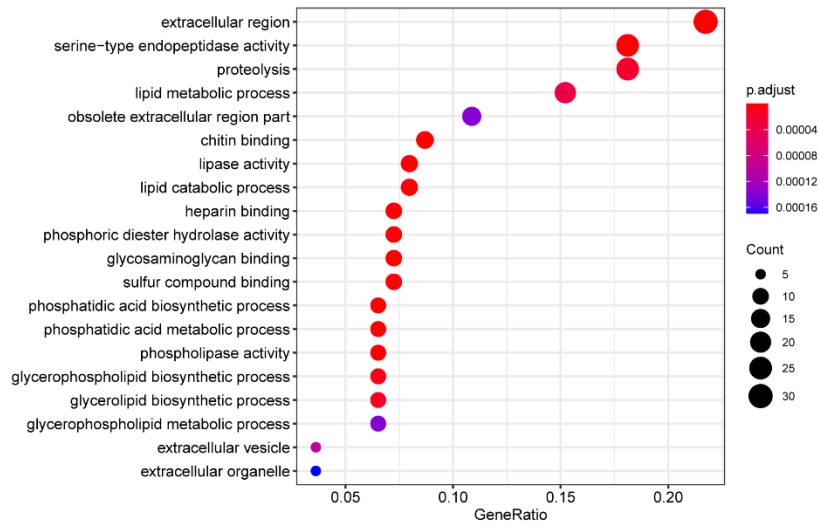

(b)

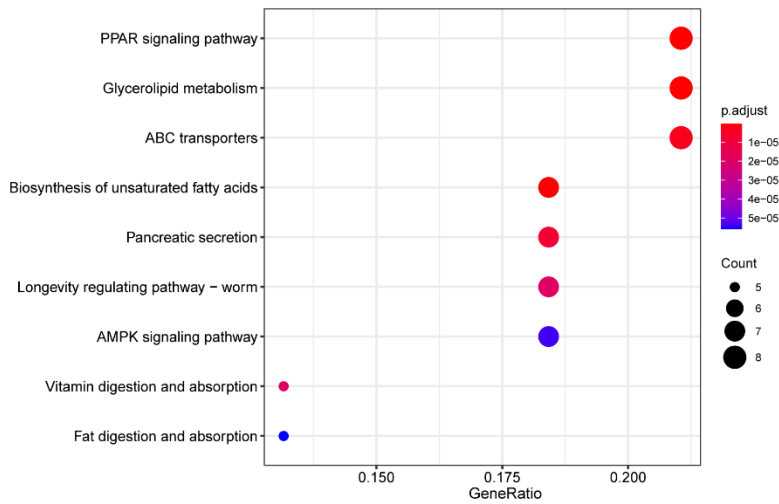

Figure S1: GO (A) and KEGG (B) function enrichment of significantly expanded gene families. Only the top 20 categories are shown.
