# Supplementary material for: A Long-Read Genome Assembly of a Native Mite in China Pyemotes zhonghuajia Yu, Zhang & He (Prostigmata: Pyemotidae) Reveals Gene Expansion in Toxin-Related Gene Families
Source: Toxins (Basel). 2022 Aug 21;14(8):571. doi: 10.3390/toxins14080571 (PMC9415403; doi:10.3390/toxins14080571)
Supplement: Supplementary file 1 [file toxins-14-00571-s001.zip › supplementary tables.xlsx]

## Sheet: Table S1
Table S1. Genome survey based on k-mer distribution for pyemotes zhonghuajia.
k-mer	Max k-mer coverage	Heterozygosity (%)		Repeat Length (bp)		Unique Length (bp)
		Max	Min	Max	Min	Max	Min
21	1000	0.0518083	0.0405813	7093149	7089681	62266319	62235874

## Sheet: Table S2
Table S2. Repeat annotation in the Pyemotes zhonghuajia genome.
Class	Copies	Length (bp)	Percentage of the genome (bp)
ARTEFACT	4	979	0
DNA	192	17602	0.0002
Academ-1	9	605	0
Academ-2	5	432	0
Academ-H	1	54	0
CMC	1	51	0
CMC-Chapaev	24	1028	0
CMC-Chapaev-3	6	440	0
CMC-EnSpm	488	77835	0.0011
CMC-Transib	27	2343	0
Crypton	11	362	0
Crypton-A	3	163	0
Crypton-C	1	124	0
Crypton-F	1	107	0
Crypton-H	25	1708	0
Crypton-I	1	94	0
Crypton-S	4	177	0
Crypton-V	33	2020	0
Crypton-X	1	83	0
Dada	19	1513	0
Ginger-1	50	3054	0
Ginger-2	20	2611	0
IS3EU	25	1821	0
Kolobok	4	248	0
Kolobok-E	2	77	0
Kolobok-H	2	189	0
Kolobok-Hydra	9	634	0
Kolobok-T2	41	2543	0
MULE-F	4	226	0
MULE-MuDR	363	133779	0.0019
MULE-NOF	8	561	0
Maverick	129	8749	0.0001
Maverick-Mavirus	1	70	0
Merlin	9	580	0
Novosib	17	1178	0
P	55	3584	0
P-Fungi	2	118	0
PIF-HarbS	3	229	0
PIF-Harbinger	268	134335	0.0019
PIF-ISL2EU	9	682	0
PIF-Spy	10	932	0
PiggyBac	129	53516	0.0007
PiggyBac-X	2	162	0
Sola-1	26	2324	0
Sola-2	15	751	0
Sola-3	6	260	0
TcMar	11	821	0
TcMar-Ant1	2	300	0
TcMar-Cweed	1	50	0
TcMar-Fot1	25	1293	0
TcMar-IS885	1	74	0
TcMar-ISRm11	18	2090	0
TcMar-Mariner	16	1022	0
TcMar-Pogo	6	396	0
TcMar-Sagan	2	204	0
TcMar-Stowaway	3	187	0
TcMar-Tc1	226	56143	0.0008
TcMar-Tc2	6	461	0
TcMar-Tc4	4	256	0
TcMar-Tigger	9	733	0
TcMar-m44	2	177	0
Zator	2	209	0
Zisupton	86	5516	0.0001
hAT	21	1322	0
hAT-Ac	134	10410	0.0001
hAT-Blackjack	18	717	0
hAT-Charlie	58	5112	0.0001
hAT-Pegasus	5	311	0
hAT-Tag1	17	1039	0
hAT-Tip100	66	3582	0
hAT-hAT1	1	18	0
hAT-hAT19	6	453	0
hAT-hAT5	3	173	0
hAT-hATm	35	2158	0
hAT-hATw	7	478	0
hAT-hATx	6	330	0
hAT-hobo	6	319	0
LINE	1	43	0
CR1	67	6206	0.0001
CR1-Zenon	1	38	0
CRE	6	578	0
CRE-Ambal	6	417	0
CRE-Odin	1	52	0
Deceiver	1	62	0
Dong-R4	2	154	0
Dualen	1	62	0
I	46	2719	0
I-Jockey	202	23514	0.0003
L1	201	16557	0.0002
L1-DRE	4	256	0
L1-Tx1	68	4070	0.0001
L2	253	29252	0.0004
Penelope	159	12025	0.0002
Proto1	5	474	0
Proto2	1	40	0
R1	456	204208	0.0028
R1-LOA	151	38722	0.0005
R2	109	60786	0.0008
R2-Hero	6	263	0
R2-NeSL	26	1985	0
RTE-BovB	69	6334	0.0001
RTE-ORTE	1	38	0
RTE-RTE	4	206	0
RTE-X	26	1974	0
Rex-Babar	6	346	0
Tad1	20	1671	0
LTR	12	1253	0
Caulimovirus	38	2345	0
Copia	2169	993896	0.0138
DIRS	14	747	0
DIRS-Q	1	48	0
ERV1	109	7092	0.0001
ERV4	1	320	0
ERVK	38	2634	0
ERVL	16	2035	0
Gypsy	1851	956643	0.0133
Ngaro	71	8391	0.0001
Pao	119	11095	0.0002
Unknown	1952	612917	0.0085
RC	--	--	--
Helitron	190	14806	0.0002
Helitron-2	2	66	0
Retroposon	1	33	0
SINE	2	1148	0
5S-RTE	1	128	0
7SL	1	164	0
B4	1	14	0
tRNA	9	330	0
tRNA-Ceph-RTE	1	61	0
tRNA-Core	1	78	0
tRNA-Deu	1	28	0
tRNA-L2	1	70	0
tRNA-Meta	1	78	0
tRNA-RTE	5	163	0
tRNA-V	1	45	0
Unknown	5024	1419278	0.0197
centromeric	1	83	0
Total_interspersed	16401	5006328	0.0696
Low_complexity	18442	1022661	0.0142
Satellite	185	27008	0.0004
acro	2	221	0
centr	1	50	0
Simple_repeat	41861	2103799	0.0292
rRNA	53	35026	0.0005
snRNA	4	458	0
tRNA	101	5919	0.0001
Total	77050	8201470	0.114

## Sheet: Table S3
Table S3. Annotations of non-coding RNAs in the Pyemotes zhonghuajia genome.
Class	Copies	Description
rRNA
5S_rRNA	36	rRNA	5S ribosomal RNA
LSU_rRNA_bacteria	6	rRNA	Bacterial large subunit ribosomal RNA
LSU_rRNA_eukarya	2	rRNA	Eukaryotic large subunit ribosomal RNA
SSU_rRNA_bacteria	2	rRNA	Bacterial small subunit ribosomal RNA
SSU_rRNA_eukarya	2	rRNA	Eukaryotic small subunit ribosomal RNA
miRNA
mir-10	2	miRNA	mir-10 microRNA precursor family
mir-124	2	miRNA	mir-124 microRNA precursor family
mir-2	1	miRNA	mir-2 microRNA precursor
mir-7	1	miRNA	mir-7 microRNA precursor
mir-8	1	miRNA	mir-8/mir-141/mir-200 microRNA precursor family
mir-9	1	miRNA	mir-9/mir-79 microRNA precursor family
snRNA
snoR38	1	snRNA; snoRNA; CD-box	Small nucleolar RNA R38
U1	1	snRNA; splicing	U1 spliceosomal RNA
U2	1	snRNA; splicing	U2 spliceosomal RNA
U3	2	snRNA; snoRNA; CD-box	Small nucleolar RNA U3
U4	1	snRNA; splicing	U4 spliceosomal RNA
U5	1	snRNA; splicing	U5 spliceosomal RNA
U6	1	snRNA; splicing	U6 spliceosomal RNA
U6atac	1	snRNA; splicing	U6atac minor spliceosomal RNA
ribozyme
RNase_MRP	1	ribozyme	RNase MRP
RNaseP_bact_a	1	ribozyme	Bacterial RNase P class A
RNaseP_bact_b	1	ribozyme	Bacterial RNase P class B
RNaseP_nuc	1	ribozyme	Nuclear RNase P
tRNA
tRNA-Ala	11	tRNA
tRNA-Arg	8	tRNA
tRNA-Asn	7	tRNA
tRNA-Asp	4	tRNA
tRNA-Cys	2	tRNA
tRNA-Gln	5	tRNA
tRNA-Glu	7	tRNA
tRNA-Gly	7	tRNA
tRNA-His	2	tRNA
tRNA-Ile	5	tRNA
tRNA-iMet/Met	6	tRNA
tRNA-Leu	8	tRNA
tRNA-Lys	7	tRNA
tRNA-Phe	2	tRNA
tRNA-Pro	6	tRNA
tRNA-Ser	7	tRNA
tRNA-Thr	6	tRNA
tRNA-Trp	2	tRNA
tRNA-Tyr	3	tRNA
tRNA-Val	7	tRNA
Others
6S	1	6S / SsrS RNA
AsdA	1	antisense RNA of dnaA mRNA
Bacteria_small_SRP	2	Bacterial small signal recognition particle RNA
C4	3	C4 antisense RNA
cspA	1	cspA thermoregulator
Histone3	11	Histone 3' UTR stem-loop
Intron_gpII	1	Group II catalytic intron
isrC	1	isrC Hfq binding RNA
K_chan_RES	3	Potassium channel RNA editing signal
L10_leader	1	Ribosomal protein L10 leader
L21_leader	1	Ribosomal protein L21 leader
Metazoa_SRP	1	Metazoan signal recognition particle RNA
MicA	1	MicA sRNA
P26	1	Pseudomonas sRNA P26
S15	1	Ribosomal S15 leader
SdsR_RyeB	1	SdsR_RyeB RNA
SraC_RyeA	1	SraC/RyeA RNA
SraG	1	SraG RNA
t44	1	t44 RNA
tmRNA	1	transfer-messenger RNA
TPP	2	TPP riboswitch (THI element)
Total	218

## Sheet: Table S4
Table S4. Significantly expanded gene families.
Reverse transcriptase	72
Zinc knuckle	51
ABC transporter	33
RNase H	29
Initiator Replication protein	26
Lipase	23
Trypsin	23
CD36 family	17
30S ribosomal protein S15	15
Chitin binding Peritrophin-A domain	12
Neurotoxin	12
DUF87 domain-containing protein	10
Dermonecrotic toxin	9
Ankyrin repeat	9
Transposase IS4	8

## Sheet: Table S5
Tbale S5: Expanded and contracted gene families in each species.
Species	Expanded fams	Genes gained	Contracted fams	Genes lost
Tetranychus urticae	1,193 (89)	3430	3,216 (0)	3281
Sarcoptes scabiei	512 (9)	668	1,220 (39)	1356
Tropilaelaps mercedesae	932 (34)	1274	901 (7)	943
Centruroides sculpturatus	3,844 (128)	10404	8,156 (2)	8229
Galendromus occidentalis	590 (56)	1467	1,623 (7)	1686
Varroa destructor	1,875 (43)	2692	728 (16)	788
Leptotrombidium delicense	1,394 (226)	3948	971 (19)	1052
Ixodes scapularis	2,591 (230)	10523	3065 (2)	3148
Pyemotes zhonghuajia	621 (26)	1224	3,664 (15)	3927
Stegodyphus dumicola	3,449 (100)	8689	8,594 (2)	8689
Dinothrombium tinctorium	1,064 (100)	2225	1,311 (65)	1491
Dermatophagoides pteronyssinus	957 (41)	1788	543 (4)	562

## Sheet: Table S6
Table S6: The identity of neurotoxins of P. zhonghuajia with P. tritici
	Pyemotes_zhonghuajia PzNT1	Hemiscorpius_lepturus HLToxin2	Centruroides_sculpturatus U24-CNTX-Pn1a_2	Centruroides_sculpturatus U24-CNTX-Pn1a_3	Centruroides_sculpturatus U24-CNTX-Pn1a_1	Araneus_ventricosus U24-CNTX-Pn1a	Nephila_pilipes U24-CNTX-Pn1a	Trichonephila_clavata U24-CNTX-Pn1a	Trichonephila inaurata U24-CNTX-Pn1a	Leptotrombidium_deliense TDF S-18-like_2	Leptotrombidium_deliense TDF S-18-like_1	Pyemotes_zhonghuajia PzNT10	Pyemotes_zhonghuajia PzNT6	Pyemotes_zhonghuajia PzNT5	Pyemotes_zhonghuajia PzNT12	Pyemotes_zhonghuajia PzNT7	Pyemotes_zhonghuajia PzNT4	Pyemotes_zhonghuajia PzNT3	Pyemotes_zhonghuajia PzNT9	Pyemotes sp. TxP1-1	Pyemotes_tritici tox21A	Pyemotes sp. TxP2-1	Pyemotes_zhonghuajia PzNT2	Pyemotes_tritici TxP-I	Pyemotes_tritici tox34	Pyemotes_zhonghuajia PzNT11	Pyemotes_zhonghuajia PzNT8
Pyemotes_zhonghuajia PzNT1		36.9128	41.8919	38.9262	41.8919	36.6013	37.2549	37.9085	37.9085	34.1935	35.7143	7.77778	6.63265	7.1066	8.62944	6.09137	8.12183	7.61421	8.79121	9.23077	10.4396	8.65385	6.91824	10.4396	10.2151	9.39227	9.44444
Hemiscorpius_lepturus HLToxin2	36.9128		46.2069	45.5172	45.5172	44.7368	39.4737	36.8421	36.8421	38.8158	42.1053	6.59341	6.59898	7.57576	6.06061	5.55556	6.56566	6.56566	8.06452	12.1212	9.83607	11.215	7.45342	9.28962	9.28962	8.83978	10.5556
Centruroides_sculpturatus U24-CNTX-Pn1a_2	41.8919	46.2069		64.0845	64.0845	40	40.3974	38.4106	39.0728	37.7483	33.7748	6.62983	6.66667	7.65306	8.16327	8.16327	10.2041	9.18367	10.2703	14.6154	12.7072	12.2642	12.5786	13.2597	13.2597	11.7318	11.236
Centruroides_sculpturatus U24-CNTX-Pn1a_3	38.9262	45.5172	64.0845		67.6056	41.0596	40.7895	42.1053	42.1053	34.2105	34.8684	8.79121	9.18367	9.64467	10.1523	10.1523	11.6751	11.6751	11.828	14.6154	13.1868	13.2075	11.25	13.1868	13.1868	12.7778	12.2905
Centruroides_sculpturatus U24-CNTX-Pn1a_1	41.8919	45.5172	64.0845	67.6056		38.6667	41.7219	41.0596	41.7219	33.7748	32.4503	7.06522	9.09091	8.54271	9.04523	9.04523	10.0503	9.54774	10.1064	13.5338	11.413	10.0917	9.25926	11.413	11.413	11.5385	9.94475
Araneus_ventricosus U24-CNTX-Pn1a	36.6013	44.7368	40	41.0596	38.6667		68.4564	71.1409	71.1409	41.5584	45.7516	6.48649	8.20513	7.69231	8.20513	6.66667	7.17949	7.17949	10.2703	10.9375	9.44444	8.57143	8.1761	10	10	10.5556	11.1732
Nephila_pilipes U24-CNTX-Pn1a	37.2549	39.4737	40.3974	40.7895	41.7219	68.4564		87.3333	88	43.5065	45.098	5.91398	8.67347	8.67347	10.2041	9.18367	8.67347	8.16327	11.828	11.6279	9.39227	5.66038	8.125	9.39227	9.39227	11.0497	10
Trichonephila_clavata U24-CNTX-Pn1a	37.9085	36.8421	38.4106	42.1053	41.0596	71.1409	87.3333		99.3333	40.9091	44.4444	5.91398	8.67347	9.18367	9.69388	9.18367	8.67347	8.67347	11.828	12.4031	8.83978	5.66038	8.125	9.39227	9.39227	11.0497	10
Trichonephila inaurata U24-CNTX-Pn1a	37.9085	36.8421	39.0728	42.1053	41.7219	71.1409	88	99.3333		41.5584	45.098	6.45161	8.67347	9.18367	9.69388	9.18367	8.67347	8.67347	11.828	12.4031	9.39227	5.66038	8.75	9.94475	9.94475	11.0497	10
Leptotrombidium_deliense TDF S-18-like_2	34.1935	38.8158	37.7483	34.2105	33.7748	41.5584	43.5065	40.9091	41.5584		67.9739	10.1604	7.03518	6.03015	8.54271	6.03015	7.03518	7.03518	9.13978	10.6061	11.413	12.2642	9.87654	11.9565	11.828	8.64865	10.3261
Leptotrombidium_deliense TDF S-18-like_1	35.7143	42.1053	33.7748	34.8684	32.4503	45.7516	45.098	44.4444	45.098	67.9739		9.34066	7.65306	7.14286	7.14286	5.61224	6.63265	6.63265	8.10811	7.63359	10.3825	9.52381	6.21118	8.74317	8.64865	8.33333	10.6145
Pyemotes_zhonghuajia PzNT10	7.77778	6.59341	6.62983	8.79121	7.06522	6.48649	5.91398	5.91398	6.45161	10.1604	9.34066		20.0855	18.7234	19.5745	20	17.4468	20.8511	19.2771	21.3198	21.371	20.8092	19.2469	23.0453	23.0453	19.5833	21.6102
Pyemotes_zhonghuajia PzNT6	6.63265	6.59898	6.66667	9.18367	9.09091	8.20513	8.67347	8.67347	8.67347	7.03518	7.65306	20.0855		68.4211	66.8132	65.4945	65.2838	67.7632	18.5083	24.6575	20.9169	18.2796	17.7843	20.3488	20.3488	22.1902	20.7602
Pyemotes_zhonghuajia PzNT5	7.1066	7.57576	7.65306	9.64467	8.54271	7.69231	8.67347	9.18367	9.18367	6.03015	7.14286	18.7234	68.4211		68.6937	75.9009	74.2152	76.5766	16.8508	23.8532	20.6897	17.9856	17.8363	20.9913	20.9913	20.1729	21.345
Pyemotes_zhonghuajia PzNT12	8.62944	6.06061	8.16327	10.1523	9.04523	8.20513	10.2041	9.69388	9.69388	8.54271	7.14286	19.5745	66.8132	68.6937		76.9752	69.7309	72.2973	16.5746	22.4771	19.5402	17.9856	16.3743	18.9504	18.9504	20.1729	21.0526
Pyemotes_zhonghuajia PzNT7	6.09137	5.55556	8.16327	10.1523	9.04523	6.66667	9.18367	9.18367	9.18367	6.03015	5.61224	20	65.4945	75.9009	76.9752		72.87	81.982	16.5746	22.4771	20.1149	17.6259	17.2515	20.4082	20.4082	21.3256	20.7602
Pyemotes_zhonghuajia PzNT4	8.12183	6.56566	10.2041	11.6751	10.0503	7.17949	8.67347	8.67347	8.67347	7.03518	6.63265	17.4468	65.2838	74.2152	69.7309	72.87		84.5291	15.9341	23.8532	18.9655	16.4875	16.035	19.4767	19.4767	19.1977	19.7674
Pyemotes_zhonghuajia PzNT3	7.61421	6.56566	9.18367	11.6751	9.54774	7.17949	8.16327	8.67347	8.67347	7.03518	6.63265	20.8511	67.7632	76.5766	72.2973	81.982	84.5291		16.0221	23.3945	20.4023	17.6259	17.2515	20.4082	20.4082	20.4611	19.883
Pyemotes_zhonghuajia PzNT9	8.79121	8.06452	10.2703	11.828	10.1064	10.2703	11.828	11.828	11.828	9.13978	8.10811	19.2771	18.5083	16.8508	16.5746	16.5746	15.9341	16.0221		24.537	24.5161	24.6753	20.7237	25.5738	25.5738	21.5686	22.9508
Pyemotes sp. TxP1-1	9.23077	12.1212	14.6154	14.6154	13.5338	10.9375	11.6279	12.4031	12.4031	10.6061	7.63359	21.3198	24.6575	23.8532	22.4771	22.4771	23.8532	23.3945	24.537		72.8205	70.4545	54.8718	71.2821	71.2821	32.6829	33.6585
Pyemotes_tritici tox21A	10.4396	9.83607	12.7072	13.1868	11.413	9.44444	9.39227	8.83978	9.39227	11.413	10.3825	21.371	20.9169	20.6897	19.5402	20.1149	18.9655	20.4023	24.5161	72.8205		76.8182	63.6678	79.5848	79.5848	30.1003	30.4348
Pyemotes sp. TxP2-1	8.65385	11.215	12.2642	13.2075	10.0917	8.57143	5.66038	5.66038	5.66038	12.2642	9.52381	20.8092	18.2796	17.9856	17.9856	17.6259	16.4875	17.6259	24.6753	70.4545	76.8182		80	82.7907	82.7907	31.1404	31.5789
Pyemotes_zhonghuajia PzNT2	6.91824	7.45342	12.5786	11.25	9.25926	8.1761	8.125	8.125	8.75	9.87654	6.21118	19.2469	17.7843	17.8363	16.3743	17.2515	16.035	17.2515	20.7237	54.8718	63.6678	80		72.043	72.043	25.6757	26.0135
Pyemotes_tritici TxP-I	10.4396	9.28962	13.2597	13.1868	11.413	10	9.39227	9.39227	9.94475	11.9565	8.74317	23.0453	20.3488	20.9913	18.9504	20.4082	19.4767	20.4082	25.5738	71.2821	79.5848	82.7907	72.043		100	31.9865	31.3131
Pyemotes_tritici tox34	10.2151	9.28962	13.2597	13.1868	11.413	10	9.39227	9.39227	9.94475	11.828	8.64865	23.0453	20.3488	20.9913	18.9504	20.4082	19.4767	20.4082	25.5738	71.2821	79.5848	82.7907	72.043	100		31.9865	31.3131
Pyemotes_zhonghuajia PzNT11	9.39227	8.83978	11.7318	12.7778	11.5385	10.5556	11.0497	11.0497	11.0497	8.64865	8.33333	19.5833	22.1902	20.1729	20.1729	21.3256	19.1977	20.4611	21.5686	32.6829	30.1003	31.1404	25.6757	31.9865	31.9865		46.9751
Pyemotes_zhonghuajia PzNT8	9.44444	10.5556	11.236	12.2905	9.94475	11.1732	10	10	10	10.3261	10.6145	21.6102	20.7602	21.345	21.0526	20.7602	19.7674	19.883	22.9508	33.6585	30.4348	31.5789	26.0135	31.3131	31.3131	46.9751

## Sheet: Table S7
Table S7: The identity of agatoxins of P. zhonghuajia with other species
	Pyemotes_zhonghuajia PzAg2	Leptotrombidium_deliense B4U80_11396	Dinothrombium_tinctorium B4U79_08921	Anopheles_albimanus LOC118457348	Anopheles_gambiae AGAP007821-PA	Anopheles_arabiensis LOC120902006	Polypedilum_vanderplankiPVAND_011959	Nasonia_vitripennis U8-AGTX-Ao1a-like	Ceratosolen_solmsi U8-AGTX-Ao1a-like	Apis_laboriosa U8-AGTX-Ao1a-like	Venturia_canescens U8-AGTX-Ao1a-like	Colletes_gigas U16-LYTX-Ls1a-like	Hermetia_illucens U8-AGTX-Ao1a-like	Chrysoperla_carnea Tbo-IT2-like	Rhynchophorus_ferrugineus GWI33_021484	Photinus_pyralis U8-AGTX-Ao1a-like	Agrilus_planipennis LOC108739741	Pyemotes_zhonghuajia PzAg3	Tetranychus_urticae U8-AGTX-Ao1a-like_1	Caerostris_extrusa CEXT_600951	Araneus_ventricosus AVEN_192013-1	Daphnia magna LOC116925294	Medioppia_subpectinata unamed	Centruroides_sculpturatus U8-AGTX-Ao1a-like_2	Procambarus_clarkii LOC123771986	Stegodyphus_dumicola U8-AGTX-Ao1a-like	Parasteatoda_tepidariorum U8-AGTX-Ao1a-like	Centruroides_sculpturatus U8-AGTX-Ao1a-like_3	Centruroides_sculpturatus U8-AGTX-Ao1a-like_1	Centruroides_sculpturatus U8-AGTX-Ao1a	Tetranychus_urticae U8-AGTX-Ao1a-like_2	Pyemotes_zhonghuajia PzAg1
Pyemotes_zhonghuajia PzAg2		33.5938	30.2326	29.5455	29.5455	29.5455	24.031	27.1318	28.6822	26.9231	27.6923	23.8462	23.8462	25.3846	22.3077	26.1538	26.1538	17.4419	23.0769	15.0485	20.8955	19.4245	23.4375	20	18.5714	19.8473	19.084	21.374	22.1374	22.1374	17.6923	19.2308
Leptotrombidium_deliense B4U80_11396	33.5938		67.8899	33.3333	33.8462	33.8462	28.4615	34.4538	31.25	32.2835	34.7458	31.3559	34.1667	33.6134	34.1667	34.1667	33.3333	13.0682	27.0492	16.0194	27.5	27.4809	23.6842	26.4463	25.1852	28.9256	25	33.0579	31.405	31.405	22.8346	24
Dinothrombium_tinctorium B4U79_08921	30.2326	67.8899		31.8182	32.3077	32.3077	26.7176	30.2521	28.125	31.4961	31.3559	30.5085	35	32.7731	33.3333	35	31.6667	13.0682	20.4918	15.0485	25.8333	27.4809	22.807	25.6198	22.963	27.2727	23.3333	28.9256	29.7521	29.7521	22.0472	22.4
Anopheles_albimanus LOC118457348	29.5455	33.3333	31.8182		78.7402	77.9528	40.3101	37.7953	40.9449	41.7323	38.5827	39.3701	38.9313	41.0853	39.8438	39.3701	40.625	17.1429	24.812	20.8738	33.3333	30.4965	28	31.8182	29.5775	27.8195	26.7176	30.8271	30.0752	30.0752	24.6269	23.4848
Anopheles_gambiae AGAP007821-PA	29.5455	33.8462	32.3077	78.7402		98.4	40.625	38.8889	42.0635	43.2	38.0952	38.8889	40	42.5197	38.2812	39.3701	42.9688	16.5714	25	21.256	32.3529	29.5775	27.4194	32.5758	30.0699	29.3233	25.9542	30.8271	31.5789	31.5789	25.1852	23.3083
Anopheles_arabiensis LOC120902006	29.5455	33.8462	32.3077	77.9528	98.4		40.625	38.8889	42.0635	43.2	38.0952	38.8889	40	42.5197	38.2812	39.3701	42.9688	16.5714	25	21.256	32.3529	29.5775	27.4194	32.5758	30.0699	29.3233	25.9542	30.8271	31.5789	31.5789	25.1852	23.3083
Polypedilum_vanderplankiPVAND_011959	24.031	28.4615	26.7176	40.3101	40.625	40.625		42.1053	46.4912	47.4138	42.1053	39.4737	44.8276	50	39.4737	45.614	43.8596	17.9191	31.746	19.0244	28.5714	30.7143	26.0163	33.8583	28.169	34.375	31.4516	28.9062	32.2835	32.2835	27.1318	23.8095
Nasonia_vitripennis U8-AGTX-Ao1a-like	27.1318	34.4538	30.2521	37.7953	38.8889	38.8889	42.1053		79.4393	60	68.3168	68.3168	46.1538	55.8824	54.902	54.4554	53.9216	16.6667	26.6129	20.5882	33.0579	32.8358	27.5	29.1667	26.8116	32.5	32.4786	35	34.1667	34.1667	26.1905	27.4194
Ceratosolen_solmsi U8-AGTX-Ao1a-like	28.6822	31.25	28.125	40.9449	42.0635	42.0635	46.4912	79.4393		60.9091	55.4545	56.3636	40.708	45.9459	47.7477	46.3636	50.4505	16.092	25	18.6275	30.2326	30.6569	26.6667	30.8943	26.8116	31.4516	32.2314	32.2581	32.2581	32.2581	24.6032	24.1935
Apis_laboriosa U8-AGTX-Ao1a-like	26.9231	32.2835	31.4961	41.7323	43.2	43.2	47.4138	60	60.9091		61.8182	68.1818	43.4783	50	48.6726	47.3214	46.9027	16.092	27.4194	22.3301	30.5344	32.8467	27.7311	31.2	28.2609	30.1587	29.2683	31.746	33.3333	33.3333	26.7717	25.6
Venturia_canescens U8-AGTX-Ao1a-like	27.6923	34.7458	31.3559	38.5827	38.0952	38.0952	42.1053	68.3168	55.4545	61.8182		67.6768	46.2264	58.6538	50	55.3398	54.8077	16.5714	26.9841	20.4878	32.7869	32.3308	29.4118	32.2314	30.2158	33.0579	32.2034	34.7107	36.6667	36.6667	24.6032	25.8065
Colletes_gigas U16-LYTX-Ls1a-like	23.8462	31.3559	30.5085	39.3701	38.8889	38.8889	39.4737	68.3168	56.3636	68.1818	67.6768		45.283	51.9231	49.0385	49.5146	49.0385	17.9191	26.6129	20.9756	36.8852	33.8346	27.7311	33.0579	27.7372	31.405	32.2034	33.8843	34.1667	34.1667	25.3968	26.6129
Hermetia_illucens U8-AGTX-Ao1a-like	23.8462	34.1667	35	38.9313	40	40	44.8276	46.1538	40.708	43.4783	46.2264	45.283		53.3981	55.3398	52.4272	54.3689	19.186	28.8	20.7921	34.7107	32.1168	27.8689	29.7521	29.7872	33.0579	31.0924	32.2314	36.6667	36.6667	24.2188	25.3968
Chrysoperla_carnea Tbo-IT2-like	25.3846	33.6134	32.7731	41.0853	42.5197	42.5197	50	55.8824	45.9459	50	58.6538	51.9231	53.3981		60.396	63.3663	57.4257	17.2414	30.3279	22.0588	35.5372	29.6296	28.3333	33.3333	30.2158	33.3333	31.3559	33.3333	35	35	26.9841	30.6452
Rhynchophorus_ferrugineus GWI33_021484	22.3077	34.1667	33.3333	39.8438	38.2812	38.2812	39.4737	54.902	47.7477	48.6726	50	49.0385	55.3398	60.396		64.6465	63.6364	16.9492	24.3421	23.6181	38.7931	34.0909	28.4483	34.7826	28.5714	33.913	35.3982	35.6522	37.3913	37.3913	28	26.8293
Photinus_pyralis U8-AGTX-Ao1a-like	26.1538	34.1667	35	39.3701	39.3701	39.3701	45.614	54.4554	46.3636	47.3214	55.3398	49.5146	52.4272	63.3663	64.6465		67.6768	18.3908	27.8689	22.6601	35	32.8358	26.6667	36.1345	31.8841	36.9748	31.0345	34.4538	37.8151	37.8151	26.4	25.2033
Agrilus_planipennis LOC108739741	26.1538	33.3333	31.6667	40.625	42.9688	42.9688	43.8596	53.9216	50.4505	46.9027	54.8077	49.0385	54.3689	57.4257	63.6364	67.6768		16.092	27.0492	20.197	35	33.5821	27.5	36.1345	30.4348	36.1345	32.4786	36.9748	37.8151	37.8151	25.6	24.3902
Pyemotes_zhonghuajia PzAg3	17.4419	13.0682	13.0682	17.1429	16.5714	16.5714	17.9191	16.6667	16.092	16.092	16.5714	17.9191	19.186	17.2414	16.9492	18.3908	16.092		18.6441	21.2264	19.2982	14.7727	17.0732	16.9591	15.1685	18.1287	15.7895	16.3743	17.6471	17.6471	13.1429	17.2414
Tetranychus_urticae U8-AGTX-Ao1a-like_1	23.0769	27.0492	20.4918	24.812	25	25	31.746	26.6129	25	27.4194	26.9841	26.6129	28.8	30.3279	24.3421	27.8689	27.0492	18.6441		21	35.9649	28.3333	39.3939	41.1215	28.7582	39.8148	36.1111	36.1111	39.4495	38.8889	35.4545	40.1869
Caerostris_extrusa CEXT_600951	15.0485	16.0194	15.0485	20.8738	21.256	21.256	19.0244	20.5882	18.6275	22.3301	20.4878	20.9756	20.7921	22.0588	23.6181	22.6601	20.197	21.2264	21		40.8377	20.202	22.6316	22.3958	23.8579	20.8333	19.2708	24.4792	24.0838	24.0838	19.403	19.0955
Araneus_ventricosus AVEN_192013-1	20.8955	27.5	25.8333	33.3333	32.3529	32.3529	28.5714	33.0579	30.2326	30.5344	32.7869	36.8852	34.7107	35.5372	38.7931	35	35	19.2982	35.9649	40.8377		36.2832	42.5743	46.0784	42.2414	41.5842	41.5842	48.5149	49	49	33.3333	34.2342
Daphnia magna LOC116925294	19.4245	27.4809	27.4809	30.4965	29.5775	29.5775	30.7143	32.8358	30.6569	32.8467	32.3308	33.8346	32.1168	29.6296	34.0909	32.8358	33.5821	14.7727	28.3333	20.202	36.2832		33.6364	38.0531	41.8803	36.2832	38.0531	39.823	40.708	40.708	27.5	26.0504
Medioppia_subpectinata unamed	23.4375	23.6842	22.807	28	27.4194	27.4194	26.0163	27.5	26.6667	27.7311	29.4118	27.7311	27.8689	28.3333	28.4483	26.6667	27.5	17.0732	39.3939	22.6316	42.5743	33.6364		38.9474	37.3832	37.8947	41.6667	47.9167	44.7917	44.7917	29.1262	33.0097
Centruroides_sculpturatus U8-AGTX-Ao1a-like_2	20	26.4463	25.6198	31.8182	32.5758	32.5758	33.8583	29.1667	30.8943	31.2	32.2314	33.0579	29.7521	33.3333	34.7826	36.1345	36.1345	16.9591	41.1215	22.3958	46.0784	38.0531	38.9474		42.9825	53.6842	45.7447	46.8085	54.2553	54.2553	32.4074	33.0189
Procambarus_clarkii LOC123771986	18.5714	25.1852	22.963	29.5775	30.0699	30.0699	28.169	26.8116	26.8116	28.2609	30.2158	27.7372	29.7872	30.2158	28.5714	31.8841	30.4348	15.1685	28.7582	23.8579	42.2414	41.8803	37.3832	42.9825		39.1304	35.0877	40.3509	40.3509	40.3509	27.8689	30
Stegodyphus_dumicola U8-AGTX-Ao1a-like	19.8473	28.9256	27.2727	27.8195	29.3233	29.3233	34.375	32.5	31.4516	30.1587	33.0579	31.405	33.0579	33.3333	33.913	36.9748	36.1345	18.1287	39.8148	20.8333	41.5842	36.2832	37.8947	53.6842	39.1304		45.7447	48.9362	56.383	56.383	30.5556	34.9057
Parasteatoda_tepidariorum U8-AGTX-Ao1a-like	19.084	25	23.3333	26.7176	25.9542	25.9542	31.4516	32.4786	32.2314	29.2683	32.2034	32.2034	31.0924	31.3559	35.3982	31.0345	32.4786	15.7895	36.1111	19.2708	41.5842	38.0531	41.6667	45.7447	35.0877	45.7447		49.4624	53.1915	52.6882	28.1818	29.9065
Centruroides_sculpturatus U8-AGTX-Ao1a-like_3	21.374	33.0579	28.9256	30.8271	30.8271	30.8271	28.9062	35	32.2581	31.746	34.7107	33.8843	32.2314	33.3333	35.6522	34.4538	36.9748	16.3743	36.1111	24.4792	48.5149	39.823	47.9167	46.8085	40.3509	48.9362	49.4624		64.5161	64.5161	36.6972	34.5794
Centruroides_sculpturatus U8-AGTX-Ao1a-like_1	22.1374	31.405	29.7521	30.0752	31.5789	31.5789	32.2835	34.1667	32.2581	33.3333	36.6667	34.1667	36.6667	35	37.3913	37.8151	37.8151	17.6471	39.4495	24.0838	49	40.708	44.7917	54.2553	40.3509	56.383	53.1915	64.5161		100	33.3333	39.2523
Centruroides_sculpturatus U8-AGTX-Ao1a	22.1374	31.405	29.7521	30.0752	31.5789	31.5789	32.2835	34.1667	32.2581	33.3333	36.6667	34.1667	36.6667	35	37.3913	37.8151	37.8151	17.6471	38.8889	24.0838	49	40.708	44.7917	54.2553	40.3509	56.383	52.6882	64.5161	100		35.7798	39.2523
Tetranychus_urticae U8-AGTX-Ao1a-like_2	17.6923	22.8346	22.0472	24.6269	25.1852	25.1852	27.1318	26.1905	24.6032	26.7717	24.6032	25.3968	24.2188	26.9841	28	26.4	25.6	13.1429	35.4545	19.403	33.3333	27.5	29.1262	32.4074	27.8689	30.5556	28.1818	36.6972	33.3333	35.7798		50.9615
Pyemotes_zhonghuajia PzAg1	19.2308	24	22.4	23.4848	23.3083	23.3083	23.8095	27.4194	24.1935	25.6	25.8065	26.6129	25.3968	30.6452	26.8293	25.2033	24.3902	17.2414	40.1869	19.0955	34.2342	26.0504	33.0097	33.0189	30	34.9057	29.9065	34.5794	39.2523	39.2523	50.9615

## Sheet: Table S8
Table S8: The identity of Dermonecrotic of P. zhonghuajia with other species
	Pyemotes_zhonghuajia PzDNT4	Pyemotes_zhonghuajia PzDNT9	Pyemotes_zhonghuajia PzDNT6	Pyemotes_zhonghuajia PzDNT7	Pyemotes_zhonghuajia PzDNT8	Pyemotes_zhonghuajia PzDNT5	Pyemotes_zhonghuajia PzDNT3	Pyemotes_zhonghuajia PzDNT1	Pyemotes_zhonghuajia PzDNT2	Medioppia_subpectinataunnamed	Dinothrombium tinctorium B4U79_05152	Dinothrombium_tinctorium B4U79_14638	Oppiella_nova unnamed	Leptotrombidium_deliense SPH-like	Leptotrombidium_deliense B4U80_01694	Leptotrombidium_deliense SMase D	Ixodes_scapularis SPH-like	Dermacentor_silvarum LOC119463851	Rhipicephalus_microplus SPH-like	Caerostris_darwini LbSicTox-betaIA1a	Loxosceles_similis loxtox protein
Pyemotes_zhonghuajia PzDNT4		26.6667	30.3571	28.9552	27.8351	30.9038	31.0976	27.673	28.3133	16.129	20.0581	22.0641	18.7861	20.2128	20.0627	21.6049	16.8196	15.6695	16.2577	19.0058	16.9753
Pyemotes_zhonghuajia PzDNT9	26.6667		67.5439	64.3275	0	20	30.7692	0	15.3846	0	0	0	0	0	12.5	7.69231	0	17.8117	0	10	9.09091
Pyemotes_zhonghuajia PzDNT6	30.3571	67.5439		89.6024	75.265	47.1642	48.5981	56.051	51.8293	30.2752	29.3051	34.296	32.9305	34.1637	32.8076	31.0559	31.4286	22.8532	30.8917	28.3237	31.677
Pyemotes_zhonghuajia PzDNT7	28.9552	64.3275	89.6024		75.265	44.4776	47.4843	56.051	50	31.1321	30.5994	34.296	33.5404	34.1637	33.2258	31.5287	30.7937	21.6066	30.8917	28.4431	31.5457
Pyemotes_zhonghuajia PzDNT8	27.8351	0	75.265	75.265		44.5614	45.6835	49.6815	48.7719	35.5634	31.25	34.296	35.7639	36.6548	32.9749	32.9749	33.2168	29.1228	32.6316	31.4685	32.3843
Pyemotes_zhonghuajia PzDNT5	30.9038	20	47.1642	44.4776	44.5614		48.7578	54.4872	51.5337	29.0761	27.7473	38.6861	29.49	33.3333	33.4395	32.2884	28.3163	27.5482	28.0105	27.5229	34.6875
Pyemotes_zhonghuajia PzDNT3	31.0976	30.7692	48.5981	47.4843	45.6835	48.7578		66.0256	57.8462	31.1526	33.2308	36.5942	32.6154	32.0285	33.5443	29.2835	33.657	29.3051	33.4416	31.5789	30.2181
Pyemotes_zhonghuajia PzDNT1	27.673	0	56.051	56.051	49.6815	54.4872	66.0256		97.4359	30.1282	36.5385	38.4615	33.3333	31.6456	33.121	28.6624	31.2102	29.2994	35.6688	27.8481	27.2152
Pyemotes_zhonghuajia PzDNT2	28.3133	15.3846	51.8293	50	48.7719	51.5337	57.8462	97.4359		29.1411	32.5228	36.6906	32.8267	32.5088	32.3899	29.4118	34.1853	26.4881	33.5463	30.7927	29.9383
Medioppia_subpectinataunnamed	16.129	0	30.2752	31.1321	35.5634	29.0761	31.1526	30.1282	29.1411		37.5375	36.8613	39.0173	37.276	34.3137	33.2258	36.7647	32.4786	34.6821	31.25	32.8025
Dinothrombium tinctorium B4U79_05152	20.0581	0	29.3051	30.5994	31.25	27.7473	33.2308	36.5385	32.5228	37.5375		50.5495	38.4615	39.5683	38.8158	35.5987	32.0475	31.339	30.3835	31.4917	33.2278
Dinothrombium_tinctorium B4U79_14638	22.0641	0	34.296	34.296	34.296	38.6861	36.5942	38.4615	36.6906	36.8613	50.5495		41.0256	41.4545	40.8759	35.7664	33.2117	33.9416	34.6715	37.4545	35.2727
Oppiella_nova unnamed	18.7861	0	32.9305	33.5404	35.7639	29.49	32.6154	33.3333	32.8267	39.0173	38.4615	41.0256		46.7626	39.6721	38.1877	34.127	36.0563	33.7838	35.3659	39.557
Leptotrombidium_deliense SPH-like	20.2128	0	34.1637	34.1637	36.6548	33.3333	32.0285	31.6456	32.5088	37.276	39.5683	41.4545	46.7626		46.7391	40.5797	36.3309	36.8231	34.657	40.2878	34.5324
Leptotrombidium_deliense B4U80_01694	20.0627	12.5	32.8076	33.2258	32.9749	33.4395	33.5443	33.121	32.3899	34.3137	38.8158	40.8759	39.6721	46.7391		46.8852	36.1842	33.9564	33.0033	35.3896	35.3896
Leptotrombidium_deliense SMase D	21.6049	7.69231	31.0559	31.5287	32.9749	32.2884	29.2835	28.6624	29.4118	33.2258	35.5987	35.7664	38.1877	40.5797	46.8852		30.9211	26.2997	27.3026	32.5879	31.8328
Ixodes_scapularis SPH-like	16.8196	0	31.4286	30.7937	33.2168	28.3163	33.657	31.2102	34.1853	36.7647	32.0475	33.2117	34.127	36.3309	36.1842	30.9211		41.7178	41.3223	35.8442	36.8078
Dermacentor_silvarum LOC119463851	15.6695	17.8117	22.8532	21.6066	29.1228	27.5482	29.3051	29.2994	26.4881	32.4786	31.339	33.9416	36.0563	36.8231	33.9564	26.2997	41.7178		54.0625	33.9523	34.7692
Rhipicephalus_microplus SPH-like	16.2577	0	30.8917	30.8917	32.6316	28.0105	33.4416	35.6688	33.5463	34.6821	30.3835	34.6715	33.7838	34.657	33.0033	27.3026	41.3223	54.0625		35.3591	36.5132
Caerostris_darwini LbSicTox-betaIA1a	19.0058	10	28.3237	28.4431	31.4685	27.5229	31.5789	27.8481	30.7927	31.25	31.4917	37.4545	35.3659	40.2878	35.3896	32.5879	35.8442	33.9523	35.3591		39.6774
Loxosceles_similis loxtox protein	16.9753	9.09091	31.677	31.5457	32.3843	34.6875	30.2181	27.2152	29.9383	32.8025	33.2278	35.2727	39.557	34.5324	35.3896	31.8328	36.8078	34.7692	36.5132	39.6774

## Sheet: Table S9
TableS9: Information of the 24 toxin-related genes
gene	Location	Annotation	Start	Stop	Strand	ORF_Length/bp	CDS_Length/bp	Protein_Length/bp	Exon_Number	Intron_Number	Exon1_Start	Exon1_Stop	Exon2_Start	Exon2_Stop	Exon3_Start	Exon3_Stop								5'-UTR-Start	5'-UTR-Stop	3'-UTR-Start	3'-UTR-Stop
PzNT1	Chr1	Neurotoxin	15565396	15566100	-	705	444	147	3	2	15565445	15565594	15565651	15565896	15565948	15566100
PzNT2	Chr1	Neurotoxin	24502362	24503201	+	840	720	239	2	1	24502362	24502641	24502762	24503201										24502260	24502361	24503202	24503554
PzNT3	Chr1	Neurotoxin	24511728	24513062	-	1335	1335	444	1	0	24511728	24513062
PzNT4	Chr1	Neurotoxin	24514334	24515674	-	1341	1341	446	1	0	24514334	24515674
PzNT5	Chr1	Neurotoxin	24522858	24524192	-	1335	1335	444	1	0	24522858	24524192												24524193	24522622	24522622	24522857
PzNT6	Chr1	Neurotoxin	24554361	24555722	-	1362	1362	453	1	0	24554361	24555722												24555723	24555774	24554316	24554360
PzNT7	Chr1	Neurotoxin	24558526	24559857	-	1332	1332	443	1	0	24558526	24559857												24559858	24559985	24558446	24558525
PzNT8	Chr2	Neurotoxin	132935	133759	+	825	825	274	1	0
PzNT9	Chr2	Neurotoxin	4294214	4295092	+	879	879	292	1	0	4294214	4295092												4294089	4294213	4295093	4295255
PzNT10	Chr3	Neurotoxin	1092618	1093460	+	843	843	280	1	0	1092618	1093460												1092138	1092617	1093461	1093726
PzNT11	Chr3	Neurotoxin	1299548	1300132	-	585	585	194	1	0	1299548	1300132
PzNT12	Chr3	Neurotoxin	9540098	9541417	+	1320	1320	439	3	2	9540098	9541417												9540070	9540097	9541418	9651596
PzDNT1	Chr3	Dermonecrotic_toxin	15708810	15709480	-	671	471	156	4	3	15708810	15709480
PzDNT2	Chr3	Dermonecrotic_toxin	15711266	15712442	-	1177	975	324	4	3	15711266	15711645	15711705	15711974	15712061	15712125	15712183	15712442						15712443	15712491	15710955	15711265
PzDNT3	Chr3	Dermonecrotic_toxin	15714642	15715776	-	1135	951	316	4	3	15714642	15715006	15715081	15715350	15715405	15715469	15715526	15715776						15715777	15715838	15714522	15714641
PzDNT4	Chr3	Dermonecrotic_toxin	15717134	15718374	-	1241	978	325	4	3	15717134	15717546	15717604	15717867	15718013	15718074	15718136	15718374						15718375	15718387	15717059	15717133
PzDNT5	Chr3	Dermonecrotic_toxin	16054385	16056387	-	2003	1353	450	4	3	16054510	16055246	16055309	16055578	16055834	16055898	16055977	16056257						16056258	16056387	16054385	16054509
PzDNT6	Chr3	Dermonecrotic_toxin	21156813	21160025	+	3213	1965	654	6	5	21156813	21157167	21157224	21157846	21158834	21159099	21159168	21159232	21159292	21159564	21159643	21160025		21156797	21156812	NAN	NAN
PzDNT7	Chr3	Dermonecrotic_toxin	21165726	21168938	+	3213	1824	607	6	5	21165726	21166080	21166137	21166681	21167810	21168012	21168081	21168145	21168205	21168477	21168556	21168938		21165692	21165725	NAN	NAN
PzDNT8	Chr3	Dermonecrotic_toxin	21225499	21226521	-	1023	846	281	4	3	21226391	21226521	21226258	21226322	21225930	21226202	21225499	21225875
PzDNT9	Chr3	Dermonecrotic_toxin	21227292	21228345	+	1054	1002	333	2	1	21227292	21227646	21227699	21228345										21227201	21227291	21228346	21228365
PzAg1	Chr2	Agatoxin	1856281	1856823	-	543	309	102	3	2	1856733	1856823	1856597	1856678	1856281	1856416
PzAg2	Chr2	Agatoxin	1862570	1871884	-	9315	381	126	2	1	1862570	1862880	1871815	1871884										1871885	1871973	1862539	1862569
PzAg3	Chr2	Agatoxin	1888351	1889843	+	1493	516	171	2	1	1888351	1888453	1889431	1889843

## Sheet: Table S10
Table S10:Transcript per million (TPM) values
Gene Name	one-day- old mites_1	one-day- old mites_2	one-day- old mites_3	seven-day-pregnant mites_1	seven-day-pregnant mites_2	seven-day-pregnant mites_3
PzNT1	62552	139706	365031	625494	637271	624982
PzNT2	43.4365	228.765	197.194	26.0266	60.2109	101.531
PzNT3	2045.37	7494.27	13579.5	70.6914	181.922	239.325
PzNT4	2808.3	13432.7	28124.2	774.069	750.781	577.891
PzNT5	19584.1	18310.4	13105.8	7105.81	6843.22	6571.05
PzNT6	2916.56	13497.4	17604.5	3050.01	3469.22	2919.51
PzNT7	624.832	2214.62	3221.91	455.307	315.49	364.139
PzNT8	12716.8	21640.9	14050	2596.93	2583.34	2858.14
PzAg1	156.68	192.571	4487.67	0	155.051	260.213
PzAg2	940.849	4822.66	31765.9	655.298	606.63	575.547
PzAg3	1302.34	3414.56	15327.6	404.735	341.281	340.184
PzNT9	4626.71	9865.07	14092.1	1497.34	1184.14	1236.12
PzNT10	3690.74	8878.18	6108.65	10209.1	9764.19	10972.7
PzNT11	162.804	969.298	526.519	476.844	444.096	537.937
PzNT12	7967.6	9574.9	10783	604.378	490.989	438.696
PzDNT5	14.084	87.9627	734.67	3959.25	3997.89	3972.93
PzDNT1	411.072	735.612	802.372	136.047	82.0536	0
PzDNT2	153037	104906	25631.3	277842	270019	277231
PzDNT3	124460	79891.5	45877	14380.8	13269.1	14204.1
PzDNT4	285714	307317	297503	20988.9	19802.1	21652.7
PzDNT6	50919	49792.2	14748.8	4582.9	3207.85	3337.06
PzDNT7	262998	197701	72516.4	24123.7	24568.8	26041.9
PzDNT8	35.9569	3050.05	2554.15	75.1763	42.2555	72.8878
PzDNT9	271.209	2276.13	1626.57	491.029	549.97	513.129

[truncated: 2 more sheets: Table S11, Table S12]
