# Supplementary figures and images for: A Long-Read Genome Assembly of a Native Mite in China Pyemotes zhonghuajia Yu, Zhang & He (Prostigmata: Pyemotidae) Reveals Gene Expansion in Toxin-Related Gene Families
Source: MDPI journal article supplement (doi:10.3390/toxins14080571), 2022-08-21

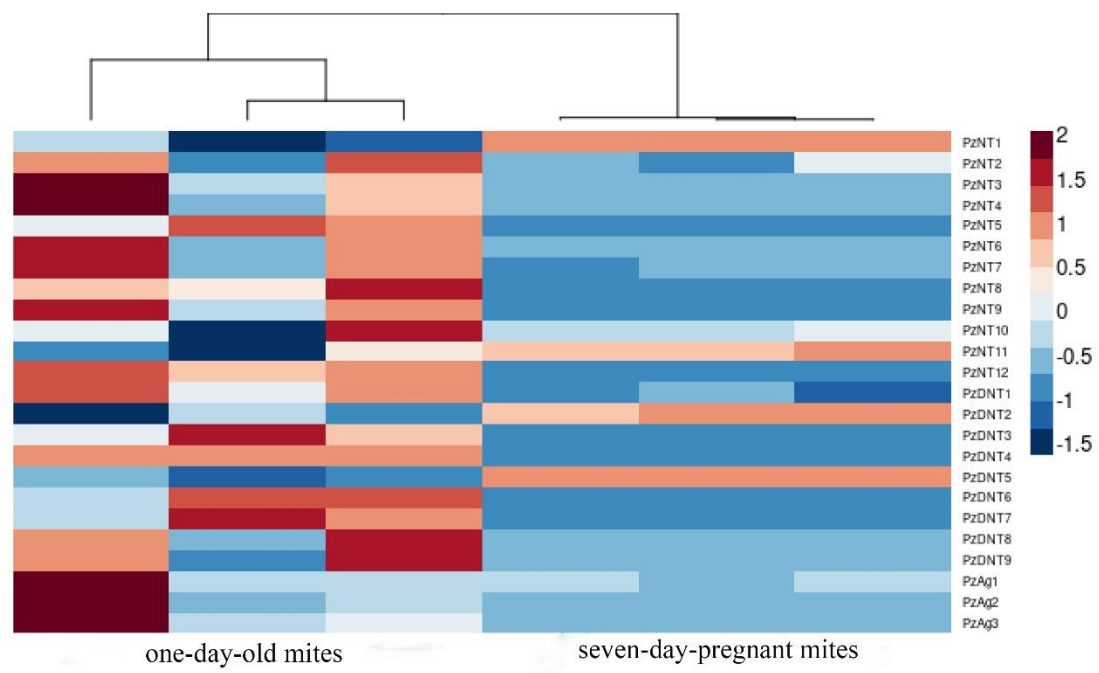

Figure S2: Heatmap of the identified toxin-related genes.

Supplement: s1 [file s1]
